# Supplementary material
Source: MDPI journal article supplement (https://www.mdpi.com/2073-4441/15/24/4228)
Supplement: s1 [file s1 › water-2713663-supplementary.pdf]

## Supplementary Materials

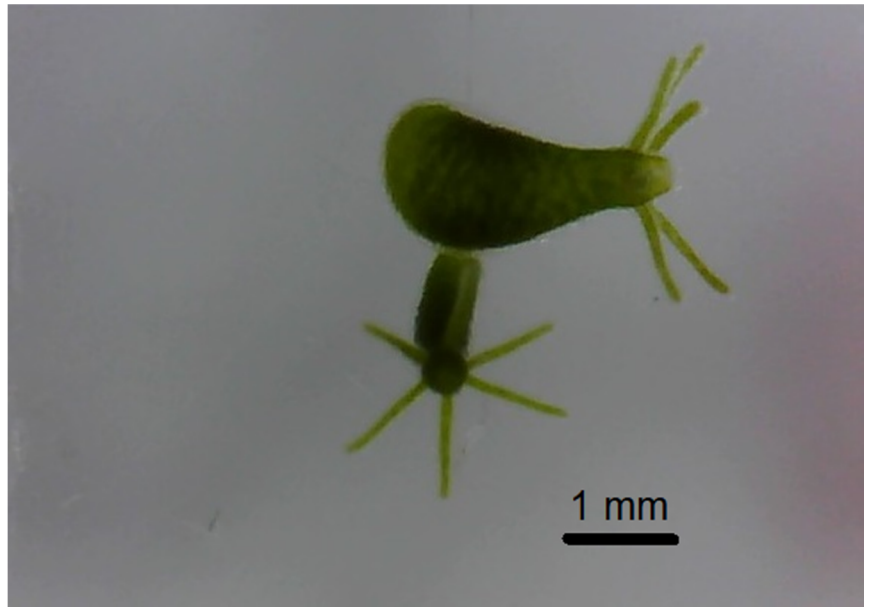

**Figure S1.** Green hydra, control (*Hydra viridissima* Pallas, 1766).

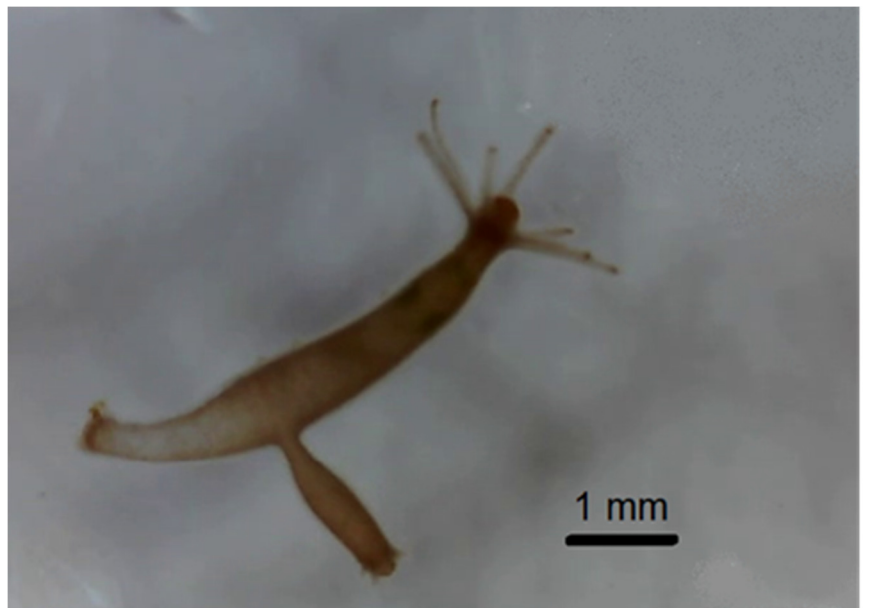

**Figure S2.** Brown hydra, control (*Hydra oligactis* Pallas, 1766).

**Table S1.** Morphological changes of tentacles in green hydra (% of analysed individuals) during the treatment with sodium metasilicate (SM).

| <b>Concentration of SM solution (g/L)</b> | <b>Long tentacles (%)</b> | <b>Short tentacles (%)</b> | <b>Reduced number of tentacles (%)</b> | <b>Loss of tentacles (%)</b> |
|-------------------------------------------|---------------------------|----------------------------|----------------------------------------|------------------------------|
| DAY 1                                     |                           |                            |                                        |                              |
| Control                                   | 0                         | 0                          | 0                                      | 0                            |
| 0.050                                     | 70                        | 0                          | 0                                      | 0                            |
| 0.365                                     | 0                         | 0                          | 0                                      | 10                           |
| 0.380                                     | 0                         | 7                          | 10                                     | 40                           |
| 0.390                                     | 0                         | 10                         | 10                                     | 33                           |
| <b>Concentration of SM solution (g/L)</b> | <b>Long tentacles (%)</b> | <b>Short tentacles (%)</b> | <b>Smaller number of tentacles (%)</b> | <b>Loss of tentacles (%)</b> |
| DAY 2                                     |                           |                            |                                        |                              |
| Control                                   | 0                         | 0                          | 0                                      | 0                            |
| 0.050                                     | 17                        | 0                          | 0                                      | 0                            |
| 0.365                                     | 0                         | 7                          | 3                                      | 0                            |
| 0.380                                     | 0                         | 0                          | 23                                     | 3                            |
| 0.390                                     | 21                        | 0                          | 27                                     | 7                            |
| <b>Concentration of SM solution (g/L)</b> | <b>Long tentacles (%)</b> | <b>Short tentacles (%)</b> | <b>Smaller number of tentacles (%)</b> | <b>Loss of tentacles (%)</b> |
| DAY 3                                     |                           |                            |                                        |                              |
| Solution                                  | 0                         | 0                          | 0                                      | 0                            |
| 0.050                                     | 33                        | 0                          | 0                                      | 0                            |
| 0.365                                     | 0                         | 0                          | 9                                      | 0                            |
| 0.380                                     | 0                         | 3                          | 0                                      | 0                            |
| 0.390                                     | 14                        | 0                          | 33                                     | 0                            |

**Table S2.** Morphological changes of tentacles in brown hydra (% of analysed individuals) during the treatment with **sodium metasilicate (SM)**.

| <b>DAY 1</b>                              |                           |                            |                                        |                              |
|-------------------------------------------|---------------------------|----------------------------|----------------------------------------|------------------------------|
| <b>Concentration of SM solution (g/L)</b> | <b>Long tentacles (%)</b> | <b>Short tentacles (%)</b> | <b>Reduced number of tentacles (%)</b> | <b>Loss of tentacles (%)</b> |
| Control                                   | 50                        | 0                          | 0                                      | 0                            |
| 0.050                                     | 10                        | 0                          | 0                                      | 0                            |
| 0.365                                     | 0                         | 0                          | 0                                      | 0                            |
| 0.380                                     | 10                        | 0                          | 0                                      | 0                            |
| 0.390                                     | 0                         | 10                         | 0                                      | 0                            |
| <b>DAY 2</b>                              |                           |                            |                                        |                              |
| <b>Concentration of SM solution (g/L)</b> | <b>Long tentacles (%)</b> | <b>Short tentacles (%)</b> | <b>Smaller number of tentacles (%)</b> | <b>Loss of tentacles (%)</b> |
| Control                                   | 50                        | 0                          | 10                                     | 0                            |
| 0.050                                     | 0                         | 0                          | 0                                      | 0                            |
| 0.365                                     | 60                        | 10                         | 0                                      | 0                            |
| 0.380                                     | 60                        | 0                          | 0                                      | 0                            |
| 0.390                                     | 0                         | 0                          | 11                                     | 0                            |
| <b>DAY 3</b>                              |                           |                            |                                        |                              |
| <b>Concentration of SM solution (g/L)</b> | <b>Long tentacles (%)</b> | <b>Short tentacles (%)</b> | <b>Reduced number of tentacles (%)</b> | <b>Loss of tentacles (%)</b> |
| Control                                   | 44                        | 0                          | 11                                     | 0                            |
| 0.050                                     | 70                        | 0                          | 10                                     | 0                            |
| 0.365                                     | 0                         | 10                         | 10                                     | 40                           |
| 0.380                                     | 0                         | 0                          | 0                                      | 20                           |
| 0.390                                     | 0                         | 0                          | 14                                     | 29                           |

**Table S3.** Response to mechanical stimuli in green hydra (% of analysed individuals) during the treatment with sodium metasilicate (SM).

| <b>DAY 1</b>                              |                                |                               |                             |                            |
|-------------------------------------------|--------------------------------|-------------------------------|-----------------------------|----------------------------|
| <b>Concentration of SM solution (g/L)</b> | <b>Normal excitability (%)</b> | <b>Lower excitability (%)</b> | <b>Low excitability (%)</b> | <b>No excitability (%)</b> |
| Control                                   | 100                            | 0                             | 0                           | 0                          |
| 0.050                                     | 100                            | 0                             | 0                           | 0                          |
| 0.365                                     | 97                             | 3                             | 0                           | 0                          |
| 0.380                                     | 57                             | 0                             | 43                          | 0                          |
| 0.390                                     | 100                            | 0                             | 41                          | 0                          |
| <b>DAY 2</b>                              |                                |                               |                             |                            |
| <b>Concentration of SM solution (g/L)</b> | <b>Normal excitability (%)</b> | <b>Lower excitability (%)</b> | <b>Low excitability (%)</b> | <b>No excitability (%)</b> |
| Control                                   | 100                            | 0                             | 0                           | 0                          |
| 0.050                                     | 100                            | 0                             | 0                           | 0                          |
| 0.365                                     | 34                             | 66                            | 0                           | 0                          |
| 0.380                                     | 100                            | 0                             | 0                           | 0                          |
| 0.390                                     | 100                            | 0                             | 0                           | 0                          |
| <b>DAY 3</b>                              |                                |                               |                             |                            |
| <b>Concentration of SM solution (g/L)</b> | <b>Normal excitability (%)</b> | <b>Lower excitability (%)</b> | <b>Low excitability (%)</b> | <b>No excitability (%)</b> |
| Control                                   | 100                            | 0                             | 0                           | 0                          |
| 0.050                                     | 100                            | 0                             | 0                           | 0                          |
| 0.365                                     | 100                            | 0                             | 0                           | 0                          |
| 0.380                                     | 97                             | 3                             | 0                           | 0                          |
| 0.390                                     | 65                             | 0                             | 35                          | 0                          |

**Table S4.** Response to mechanical stimuli in brown hydra (% of analysed individuals) during the treatment with sodium metasilicate (SM).

| <b>DAY 1</b>                              |                                |                               |                             |                            |
|-------------------------------------------|--------------------------------|-------------------------------|-----------------------------|----------------------------|
| <b>Concentration of SM solution (g/L)</b> | <b>Normal excitability (%)</b> | <b>Lower excitability (%)</b> | <b>Low excitability (%)</b> | <b>No excitability (%)</b> |
| Control                                   | 50                             | 50                            | 0                           | 0                          |
| 0.050                                     | 100                            | 0                             | 0                           | 0                          |
| 0.365                                     | 0                              | 100                           | 0                           | 0                          |
| 0.380                                     | 0                              | 100                           | 0                           | 0                          |
| 0.390                                     | 0                              | 90                            | 10                          | 0                          |

  

| <b>DAY 2</b>                              |                                |                               |                             |                            |
|-------------------------------------------|--------------------------------|-------------------------------|-----------------------------|----------------------------|
| <b>Concentration of SM solution (g/L)</b> | <b>Normal excitability (%)</b> | <b>Lower excitability (%)</b> | <b>Low excitability (%)</b> | <b>No excitability (%)</b> |
| Control                                   | 0                              | 50                            | 50                          | 0                          |
| 0.050                                     | 0                              | 50                            | 50                          | 0                          |
| 0.365                                     | 0                              | 60                            | 40                          | 0                          |
| 0.380                                     | 30                             | 70                            | 0                           | 0                          |
| 0.390                                     | 33                             | 67                            | 0                           | 0                          |

  

| <b>DAY 3</b>                              |                                |                               |                             |                            |
|-------------------------------------------|--------------------------------|-------------------------------|-----------------------------|----------------------------|
| <b>Concentration of SM solution (g/L)</b> | <b>Normal excitability (%)</b> | <b>Lower excitability (%)</b> | <b>Low excitability (%)</b> | <b>No excitability (%)</b> |
| Control                                   | 8                              | 10                            | 70                          | 12                         |
| 0.050                                     | 0                              | 10                            | 70                          | 20                         |
| 0.365                                     | 0                              | 0                             | 70                          | 30                         |
| 0.380                                     | 20                             | 10                            | 50                          | 20                         |
| 0.390                                     | 0                              | 90                            | 10                          | 0                          |

**Table S5.** Mortality of green and brown hydra.

| <b>DAY 1</b>                              |                                     |                                     |
|-------------------------------------------|-------------------------------------|-------------------------------------|
| <b>Concentration of SM solution (g/L)</b> | <b>Mortality of green hydra (%)</b> | <b>Mortality of brown hydra (%)</b> |
| Control                                   | 0                                   | 0                                   |
| 0.050                                     | 0                                   | 0                                   |
| 0.365                                     | 0                                   | 0                                   |
| 0.380                                     | 0                                   | 0                                   |
| 0.390                                     | 3                                   | 0                                   |

  

| <b>DAY 2</b>                              |                                     |                                     |
|-------------------------------------------|-------------------------------------|-------------------------------------|
| <b>Concentration of SM solution (g/L)</b> | <b>Mortality of green hydra (%)</b> | <b>Mortality of brown hydra (%)</b> |
| Control                                   | 0                                   | 0                                   |
| 0.050                                     | 0                                   | 0                                   |
| 0.365                                     | 6                                   | 0                                   |
| 0.380                                     | 0                                   | 0                                   |
| 0.390                                     | 3                                   | 10                                  |

  

| <b>DAY 3</b>                              |                                     |                                     |
|-------------------------------------------|-------------------------------------|-------------------------------------|
| <b>Concentration of SM solution (g/L)</b> | <b>Mortality of green hydra (%)</b> | <b>Mortality of brown hydra (%)</b> |
| Control                                   | 0                                   | 10                                  |
| 0.050                                     | 0                                   | 0                                   |
| 0.365                                     | 0                                   | 0                                   |
| 0.380                                     | 0                                   | 0                                   |
| 0.390                                     | 7                                   | 22                                  |
